# Supplementary material for: Hotspots of extreme heat under global warming
Source: Springer Nature journal article supplement (doi:10.1007/s00382-020-05263-w), 2020-05-27
Supplement: MOESM1 [file 382_2020_5263_MOESM1_ESM.pdf]

## Supplementary Information

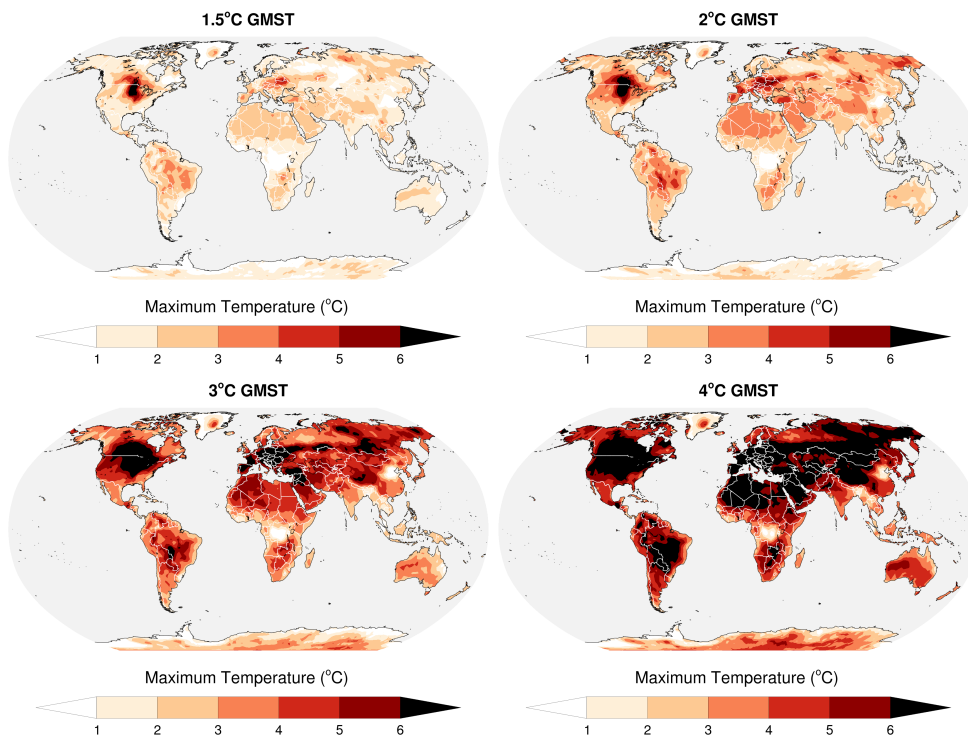

**Fig. S1 Maximum absolute summer maximum temperature increase with respect to pre-industrial levels.** Increase in absolute maximum summer maximum value of monthly maximum temperature (TXx) under different global warming levels simulated by MPI-GE, relative to absolute maximum TXx in the pre-industrial climate at 0°C of global warming. The simulated maximum temperatures represent the 99.5th percentile value for each distribution minus the 99.5th percentile value for the pre-industrial distribution at each grid cell.

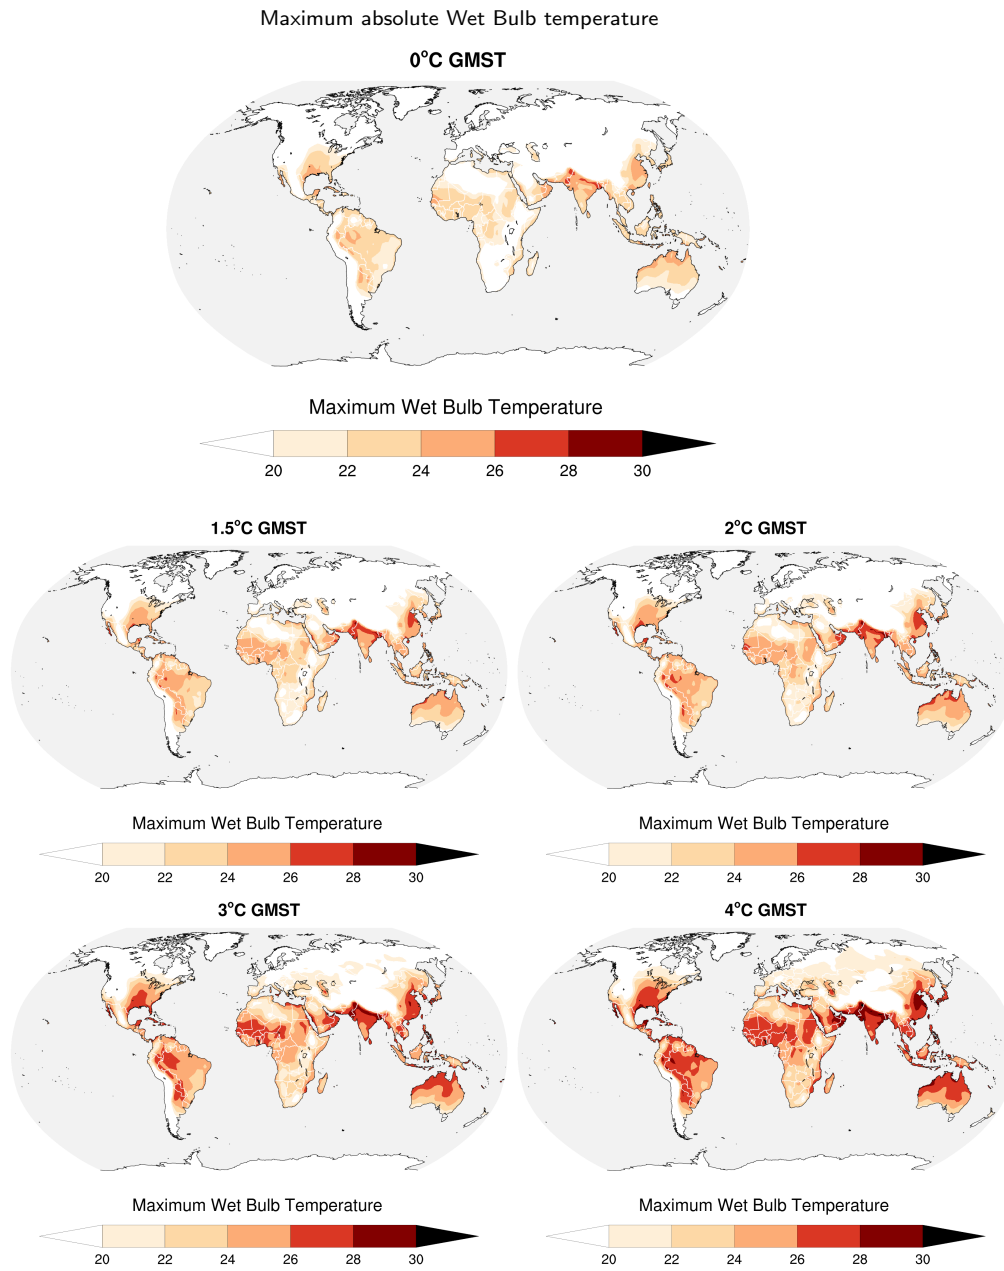

**Fig. S2** Uncorrected maximum absolute extreme Wet Bulb temperatures at different global warming levels. Maximum uncorrected Wet Bulb temperatures at different global warming levels,

---

Global warming level of Wet Bulb temperature threshold exceedance

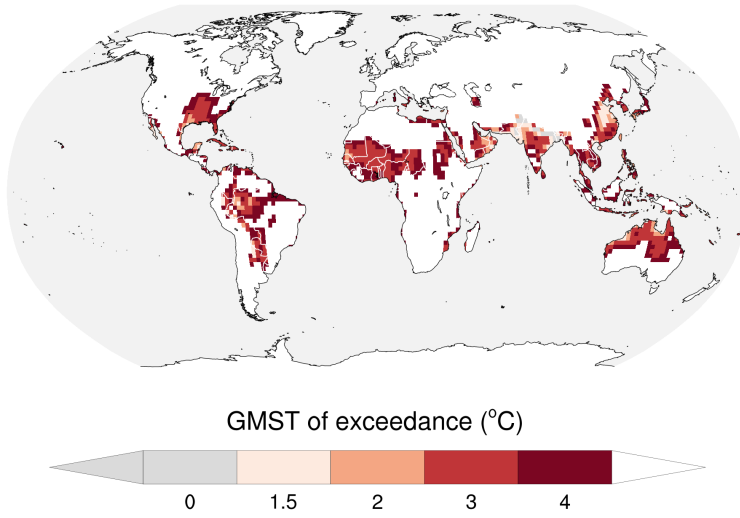

**Fig. S3 Global warming level of exceedance of extreme uncorrected Wet Bulb temperature threshold.** Global warming level measured as GMST that exhibits exceedance of the uncorrected wet bulb temperature threshold ( $W > 26^{\circ}\text{C}$ ) with probability of 1% or higher.
